# 1 **Improving patient-centred counselling skills among lay** 2 **healthcare workers in South Africa using the Thusa-Thuso** 3 **motivational interviewing training and support program**

4 Idah Mokhele<sup>1</sup>, Tembeka Sineke<sup>1</sup>, Marnie Vujovic<sup>2</sup>, Robert A.C. Ruiters<sup>3</sup>, Jacqui Miot<sup>1</sup>,  
5 Dorina Onoya<sup>1\*</sup>

6 1. Health Economics and Epidemiology Research Office, Faculty of Health  
7 Sciences, University of the Witwatersrand, Johannesburg, South Africa

8 2. ANOVA Health Institute, Johannesburg, South Africa

9 3. Department of Work and Social Psychology, Maastricht University, Maastricht,  
10 the Netherlands

11 **\*Corresponding author:** Dorina Onoya, Health Economics and Epidemiology Research  
12 Office, Building C, First Floor, Sunnyside Office Park, 32 Princess of Wales Terrace,  
13 Parktown, Johannesburg 2193, South Africa, [donoya@heroza.org](mailto:donoya@heroza.org) +27 10 001 7930

14

## 15 **Abstract:**

### 16 **Background**

17 We developed a motivational Interviewing (MI) training and support program for lay  
18 counsellors in South Africa – branded "Thusa-Thuso - helping you help", commonly referred  
19 to as Thusa-Thuso. We present the results of a pilot study to determine the program's impact  
20 on MI technical skills and qualitatively assess the feasibility of a training-of-trainers (TOT)  
21 scale-up strategy among counselling staff of non-governmental (NGO) partners of the human  
22 immunodeficiency virus (HIV) treatment program in South Africa.

### 23 **Methods**

**NOTE: This preprint reports new research that has not been certified by peer review and should not be used to guide clinical practice.**

24 We enrolled adult ( $\geq 18$  years) lay counsellors from ten primary healthcare clinics in  
25 Johannesburg (South Africa) selected to participate in the Thusa-Thuso training and support  
26 program. Counsellors attended the ten-day baseline and quarterly refresher training over 12  
27 months (October 2018-October 2019). Each counsellor submitted two audio recordings of  
28 mock counselling sessions held during the ten-day baseline training and two additional  
29 recordings of sessions with consenting patients after each quarterly contact session. We  
30 reviewed the recordings using MI treatment integrity (MITI) coding to determine MI  
31 technical (cultivating change talk and softening sustain talk) and relational (empathy and  
32 partnership) competency scores before and after training. After 12 months of support with  
33 pilot site counsellors, we were asked to scale up the training to NGO partner team trainers in  
34 a once-off five-day Training of trainers (TOT) format (n = 127 trainees from November 2020  
35 to January 2021). We report TOT training experiences from focus group discussions (n = 42)  
36 conducted six months after the TOT sessions.

## 37 **Results**

38 Of the 25 enrolled lay counsellors from participating facilities, 10 completed the 12-month  
39 Thusa-Thuso program. Attrition over the 12 months was caused by death (n = 3), site  
40 exclusion/resignations (n = 10), and absence (n = 2). MI competencies improved as follows:  
41 the technical skills score increased from a mean of 2.5 (standard deviation (SD): 0.8) to 3.1  
42 (SD: 0.5), with a mean difference of 0.6 (95% confidence interval (CI): 0.04, 0.9). The MI  
43 relational skills score improved from a mean of 3.20 (SD: 0.7) to 3.5 (SD: 0.6), with a mean  
44 difference of 0.3 (95% CI: -0.3, 0.9). End-point qualitative data from the counsellors  
45 highlighted the value of identifying and addressing specific skill deficiencies and the  
46 importance of counsellors being able to self-monitor skill development using the MITI.  
47 Participants appreciated the ongoing support to clarify practical MI applications. The TOT  
48 program tools were valuable for ongoing on-the-job development and monitoring of quality

49 counselling skills. However, the MITI review process was perceived to be too involved for  
50 large-scale application and was adapted into a scoring form to document sit-in mentoring  
51 sessions.

## 52 **Conclusion**

53 The Thusa-Thuso MI intervention can improve counsellor motivation and skills over time. In  
54 addition, the program can be scaled up using an adapted TOT process supplemented with  
55 fidelity assessment tools, which are valuable for skills development and ongoing  
56 maintenance. However, further studies are needed to determine the effect of the Thusa-Thuso  
57 program on patient ART adherence and retention in care.

58 **Keywords:** HIV, antiretroviral therapy, motivational interviewing, lay counsellors, South  
59 Africa.

60 **Registration:** Pan African Clinical Trials Registry No: PACTR202212796722256 (12  
61 December 2022)

## 62 **Introduction**

63 South Africa's implementation of the Universal test and treat (UTT) policy and same-day  
64 initiation (SDI) strategy has resulted in 5.5 million HIV-positive patients initiating  
65 antiretroviral therapy (ART) by 2021 (1-3). These policies offer immediate treatment upon  
66 diagnosis, leading to improved access and earlier initiation of ART (1). With the SDI  
67 strategy, 80% to over 90% of HIV-eligible patients initiate ART within 30 days (4, 5).  
68 However, 20% of patients still delay starting treatment six months after diagnosis despite the  
69 availability of early initiation (6).

70 Challenges in patient retention persist under the UTT and SDI policy in South Africa,  
71 leading to a shift in patient attrition from the pre-ART phase after diagnosis to the period  
72 after ART initiation (6). Factors such as denial of HIV diagnosis, fears of social isolation, and  
73 concerns about medication side effects can hinder sustained ART adherence (7, 8). Adequate  
74 patient support is crucial for long-term retention in care (9). The clinic environment, support  
75 networks, and self-efficacy for ART adherence are all facilitators of patients remaining in  
76 care for over ten years (10). However, implementing universal and early ART policies has  
77 placed an additional burden on the healthcare system, gradually reducing the quality of  
78 psychosocial support for HIV-positive clients at primary healthcare (PHC) clinics (10, 11).

79 Patient-centred care focuses on treating patients as individuals, considering their  
80 values and preferences in healthcare delivery (12). However, policy directives promoting  
81 patient-centred care in the public health sector in South Africa lack clearly defined  
82 methodologies for training health workers in their implementation (13). The critical shortage  
83 of health professionals in South Africa, especially in rural areas, also poses a major obstacle  
84 to achieving patient-centred care and universal access to HIV treatment (14-16). Through  
85 task-shifting, lay counsellors have become pivotal in HIV testing, counselling, and providing  
86 psychosocial and support services in PHC clinics (17-19). However, due to minimal training

87 and support, they often have limited basic counselling skills, limiting their effectiveness in  
88 balancing the demands of providing HIV testing services and quality patient-centred  
89 counselling (20, 21).

90 With increasing emphasis on patient-centred counselling, motivational interviewing  
91 (MI) is being incorporated into models of care to help patients identify and address obstacles  
92 they may face in accessing and adhering to ART (7, 22-24). MI requires the application of  
93 both relational and technical skills. Relational skills encompass active listening, empathy, and  
94 building rapport. These skills are crucial for establishing a collaborative and empathetic  
95 relationship between the counsellor and client (25, 26). Technical skills involve specific  
96 techniques like open-ended questioning, reflective listening, summarizing, affirming, and  
97 eliciting the patient's motivation for change, enabling the counsellor to explore ambivalence,  
98 enhance motivation, and facilitate behaviour change (25, 26). MI relational and technical  
99 skills have been shown to positively impact clients' contemplation and reflection on  
100 behaviour change (25, 27, 28).

101 However, MI is typically delivered by trained therapists and skilled healthcare  
102 professionals. (27, 29-31). Limited evidence exists for training lay counsellors in MI in PHC  
103 settings in sub-Saharan Africa and the use of MI counselling as a strategy for promoting ART  
104 uptake and retention. When applied in risk reduction counselling in South Africa, ineffective  
105 counsellor training and the lack of ongoing mentoring support have resulted in limited impact  
106 (32). Additionally, although culturally adapted MI counselling has demonstrated therapeutic  
107 benefits across diverse populations (33-35), efforts to adapt MI to sub-Saharan African  
108 contexts, particularly involving lay health workers, have been minimal (29, 36, 37).

109 In the recent PAED-LINK trial, lay personnel were trained in MI counselling using  
110 online training tools for the brief negotiated interviewing (BNI) intervention (38). The BNI is  
111 a structured MI counselling approach that addresses risky behaviours and promotes behaviour

112 change in emergency healthcare settings (39). The PAED-LINK trial demonstrated high  
113 acceptability for MI counselling methods. Still, it highlighted the need for contextual  
114 adaptations, fidelity assessment and mentoring support to facilitate learning and retention of  
115 MI skills (38). To address these deficiencies and establish an approach for training lay  
116 counsellors in patient-centred counselling, we used the Intervention Mapping protocol, a  
117 framework for developing evidence-based health promotion programs (40). We incorporated  
118 the BNI training tools (39) and partnered with counselling skills trainers to develop a training  
119 program collaboratively. The intervention we developed, titled "Thusa-Thuso - helping you  
120 help", commonly referred to as Thusa-Thuso, is a contextually relevant MI training program  
121 for continued MI skill development and support for lay counsellors in South Africa (41).

122 We report findings from a pilot study to determine the effect of the Thusa-Thuso  
123 program on lay counsellors' MI technical and relational skills. In addition, we describe the  
124 results of a qualitative assessment of the feasibility of a training-of-trainers (TOT) scale-up  
125 model among non-governmental (NGO) partners of the HIV treatment program in South  
126 Africa.

## 127 **Materials and methods**

### 128 **Overview of the study population**

129 We conducted a pilot, mixed-method study comprising lay counsellors from ten public PHC  
130 clinics randomly assigned to receive the MI training intervention as part of a planned  
131 randomized controlled trial in Johannesburg, South Africa (trial registration number:  
132 PACTR202212796722256). These PHC clinics currently provide HIV counselling and  
133 testing services as well as manage HIV-positive patients on ART. All lay counsellors  
134 working at the selected PHC clinics were approached to participate in the study. Drawing  
135 from our prior experiences with the ten PHC clinics in other research studies, where we

136 consistently observed an average of three counsellors working per facility, we aimed to  
137 recruit 30 counsellors for the current study.

138 Counsellors were referred to the study staff by facility managers. They were eligible  
139 to participate in the study if they regularly worked at the selected facility and were willing to  
140 participate in the 12-month Thusa-Thuso training and support program, and willing to  
141 participate in study interviews at baseline, post-training, and after 12 months.

### 142 **The Thusa-Thuso MI training intervention**

143 The Thusa-Thuso MI training program aims to improve general HIV counselling  
144 skills, build sustained MI skills, and ultimately improve ART uptake and retention in care  
145 among persons living with HIV (PLHIV). The program consists of a ten-day baseline training  
146 followed by two-day quarterly refresher training and debriefing sessions for the 12-month  
147 training duration (41). Training methods applied in the program include didactic training  
148 sessions, observation learning through skills demonstration videos that model "good" and  
149 "bad" MI counselling and opportunities for skills practice with qualitative training facilitator  
150 and peer feedback during onsite baseline and quarterly refresher training sessions to cultivate  
151 a supportive learning environment. The training program includes formal feedback via the  
152 motivational interviewing treatment integrity (MITI) system, a validated system used to  
153 assess and provide feedback on the fidelity and quality of MI interventions to improve  
154 proficiency in MI counselling (42, 43).

155 The HIV treatment readiness framework, a process model for ART readiness guided  
156 the training, provided in supplementary Fig 1 and published elsewhere (44) underscoring that  
157 readiness is based on correct knowledge, perceived importance, MI skills, and readiness for  
158 quality counselling (41). It is based on the information motivational and behavioural (IMB),  
159 which emphasizes accurate information, motivation, and essential skills in shaping health  
160 behaviours (45). It also incorporates change theory, which explores transitions in behaviour

161 adoption stages, emphasizing readiness and motivation for change (46). The theory of  
162 planned behaviour is also integrated, which suggests that attitudes, norms, and control guide  
163 human behaviour affect intentions and actions (47).

## 164 **Data collection**

### 165 **Survey data collection**

166 Trained study staff screened potential eligible lay counsellors and obtained written informed  
167 consent among those eligible in their preferred language (English, Sotho, or Zulu). Study  
168 enrolment took place from April to October 2018. Counsellors participated in the Thusa-  
169 Thuso MI training and support program from October 2018 to October 2019, during which  
170 participants were encouraged and provided with support to apply the MI approach in their  
171 routine HIV testing counselling sessions.

172 We interviewed counsellors at study enrolment using an interviewer-administered  
173 baseline questionnaire. Study questionnaires were written in English and administered in the  
174 participant's preferred language (English, Sotho, or Zulu). Data collected included socio-  
175 demographic information, training background, as well as personal and work-related  
176 contextual factors.

### 177 **Qualitative data collection**

178 We conducted focus group discussions (FGD) among lay counsellors from the study sites  
179 after completing the Thusa-Thuso training pilot (at 12 months). FGDs were conducted by  
180 trained interviewers to gather information regarding lay counsellor experiences of the training  
181 program, including how the training impacted their counselling approach, interactions with  
182 clients and their motivation related to their responsibilities in their work environment. The  
183 FGD lasted approximately 60 minutes and was conducted in a venue outside the lay  
184 counsellors' workplaces.



185 After completion of the pilot project, we were requested by The United States Agency  
186 for International Development (USAID) to conduct a once-off training-of-trainers (TOT)  
187 scale-up training among non-governmental organizations (NGO) partners of the HIV  
188 treatment program in South Africa. The TOTs took place from November 2020 to January  
189 2021 with 127 trainees. Each training session consisted of 20-25 trainees, facilitated by four  
190 facilitators. The TOT training spanned five days; it consisted of three-day interactive  
191 Zoom/in-person sessions, a practical in-clinic counselling day with live mentoring support,  
192 and a final day for reviewing concepts and experiences during the practice day. The TOT was  
193 designed to impart MI counselling and training skills, as these skills are required to roll out  
194 the training to their teams.

195 After the TOT training, we conducted six-month follow-up FGDs with participants to  
196 learn about their scale-up experience. Overall, four FGDs were conducted with 8-12 adult ( $\geq$   
197 18 years) participants per FGD, coming to a total of  $n = 42$  (Table 1). The interview guide  
198 explored their experience during the TOT training, their scale-up approaches, and their  
199 experience implementing the training program. All FGDs were conducted in English, Zulu,  
200 and Sotho and audio recorded. All audio recordings were transcribed verbatim for analysis.

201 **Table 1.** Overview of study participants for the focus group discussions (FGDs) for scalability and  
202 process evaluation.

| Type of provider                           | Total     |
|--------------------------------------------|-----------|
| Lay counsellor trainers/supervisors        | 3         |
| Project Coordinators                       | 3         |
| Social auxiliary workers                   | 6         |
| Enrolled nursing assistant                 | 1         |
| Technical advisors: Psychosocial support   | 2         |
| Lay HIV counsellor                         | 15        |
| Peer educators                             | 2         |
| Community Systems Technical Officer (CSTO) | 10        |
| <b>Total</b>                               | <b>42</b> |

## 203 **Analytical variables**

204 We collected socio-demographic data of lay counsellors' who participated in the pilot  
205 training, including sex, age, marital status, and highest education level. We assessed  
206 household characteristics, including the primary residence location, type of residence, and  
207 household members. In addition, we collected participants' English literacy and training  
208 background, as well as when they last attended an HIV counselling and testing-related  
209 training and how long the training session lasted. In addition, we asked participants when  
210 they last tested for HIV and their latest results.

211 We used a previously described household amenities index, including participants'  
212 household characteristics (type of toilet facilities, energy used for cooking, housing structure,  
213 household density, and food availability) and ownership of household assets (television,  
214 radio, refrigerator, satellite television, cellular telephone, landline telephone, microwave  
215 oven, and personal computer) (48). Total scores for household amenities ranged from 0 to 1,  
216 with higher total scores reflecting greater household access to amenities (Cronbach's alpha =  
217 0.81). A cut-off score of 0.3 or less indicated a "low" amenities score, while 0.3 to 0.67  
218 indicated a "medium" amenities score, and a score higher than 0.67 indicated a "high"  
219 amenities score.

## 220 **MI process and data**

221 During the pilot training, all roleplay MI sessions involving lay counsellors were audio-  
222 recorded with the permission of the counsellors. These recordings were utilized to model  
223 effective counselling behaviour. Additionally, counsellors submitted audio recordings of  
224 counselling sessions with consenting patients after each quarterly contact session. Audio  
225 recordings were assessed for fidelity to the MI process using the MITI coding system (42,  
226 43). MITI includes the following two components: (1) global scores are assigned on a five-

227 point Linkert scale to characterize entire interactions as cultivating change talks (CCT),  
228 softening sustain talk (SST), empathy (EM), or partnership (PA), and (2) behaviour counts  
229 that require that assessors tally instances of particular counsellor behaviours such as complex  
230 reflections (CR), simple reflections (SR), affirmations, and emphasizing client autonomy (37,  
231 42). Two independent assessors rated each counsellor. The ratings for each  
232 session/participant were averaged to obtain the final values.

### 233 **MITI training and supervision**

234 The study PI initially trained the MITI assessors to use the MITI system in a two-day  
235 workshop. The workshop included didactic instruction, a review of the MITI manual, and  
236 group practice using practice examples from the MINT website  
237 (<https://motivationalinterviewing.org/motivational-interviewing-resources>). They also  
238 underwent refresher training, which included group practice using a sample of real-life  
239 example recordings from the pilot study.

### 240 **Outcome measures and analysis**

#### 241 **MI Competency**

242 Overall, MI adherence scores for each user were determined using the following formulae for  
243 each MI proficiency category (43):

- 244 – Technical Global (Technical) = (Cultivating Change Talk + Softening Sustain Talk) / 2
- 245 – Relational Global (Relational) = (Partnership + Empathy) / 2

246 We compared the mean scores of each MI adherent measure for each timeline pair using  
247 paired t-tests to assess changes in MI proficiency. An overall assessment was conducted  
248 using data from the first and last quarters of the training to assess mean differences across  
249 time points.

## 250 **Data Analysis**

### 251 **Quantitative data analysis**

252 Participant characteristics were described using proportions, frequencies, means with  
253 standard deviation, and medians with interquartile ranges (IQR), as appropriate. Fisher's  
254 exact test was used for discrete variables when expected frequencies were less than five. We  
255 conducted a within-intervention group before and after analysis, comparing median scores for  
256 skills components at baseline, five months, and 11 months after first contact to determine  
257 changes in MI skills as measured by MITI codes. Comparisons were made using the t-test for  
258 dependent samples, comparing skills levels before and after training sessions. Data was  
259 analyzed using STATA version 14 (StataCorp, College Station, TX).

### 260 **Qualitative data analysis**

261 All transcripts from the FGDs were analyzed thematically. Initial themes were drawn from  
262 topics covered in the interview guide. We also used the HIV treatment readiness framework,  
263 the process model for ART readiness, specifically developed for the Thusa-Thuso training  
264 program, (supplementary Fig 1) (44), as an additional thematic guide for the analysis. The  
265 model acted as an extra thematic guide, centering on crucial aspects such as knowledge,  
266 motivation, and readiness for change (41). We consolidated individual coding through a  
267 series of group workshops. Any coder variation was resolved through discussion and  
268 consensus from all research team members.

### 269 **Ethical review**

270 All participants provided written informed consent administered by trained study staff before  
271 all data collection procedures. Confidentiality and anonymity were safeguarded by removing  
272 all identifiers, including participants' names and names of facilities, from the data. This study

273 was reviewed and approved by the Human Research Ethics Committee (Medical) of the  
274 University of the Witwatersrand (Wits HREC M170579).

## 275 **Results**

### 276 **Baseline demographic characteristics of pilot participants**

277 Of the 27 lay counsellors screened during the study period, 100% were eligible, and 25  
278 consented to participate and completed the baseline study interview (Fig 3). Of these, 19  
279 attended the baseline training; two died, and three were NGO counsellors who were no longer  
280 funded and had stopped supporting the site before the baseline training program started. For  
281 logistical reasons, two sites were excluded from the pilot training and study. Training support  
282 and mentoring were not possible at these clinics because of limitations in infrastructure.  
283 Overall, 10 of the original 25 counsellors (40%) completed the training program and  
284 participated in the baseline and all refresher training sessions.

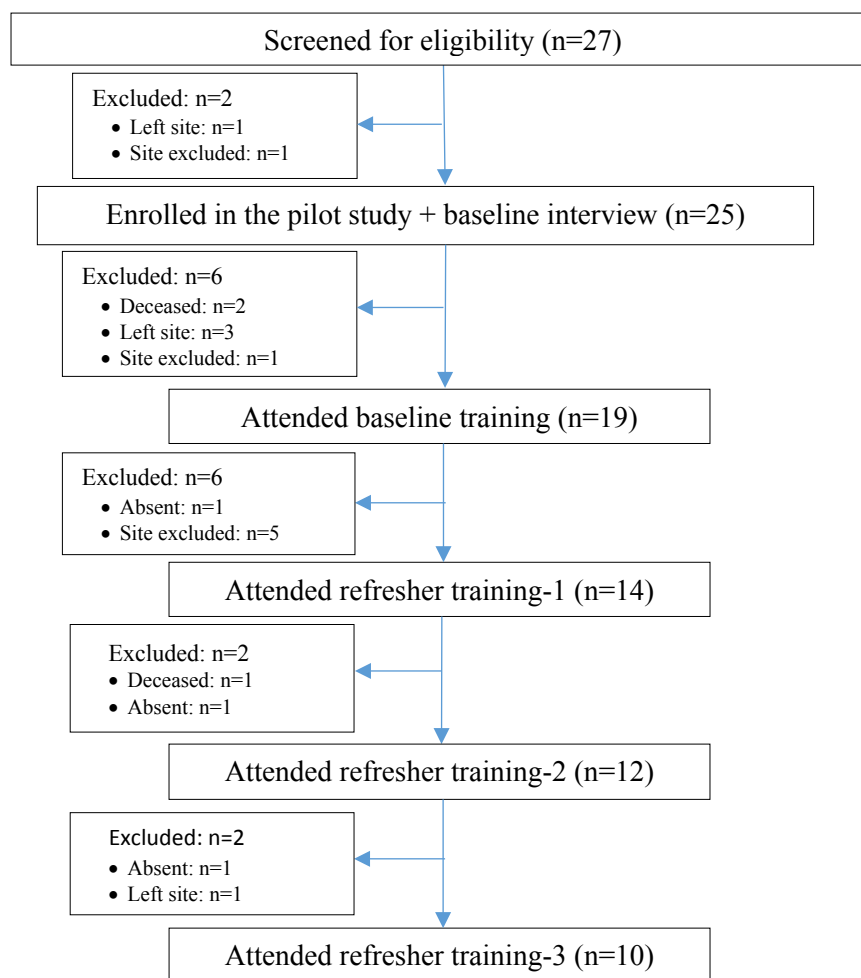

285

286 **Fig 1.** Recruitment, participant eligibility, and enrolment among adult ( $\geq 18$  years) lay  
 287 counsellors working in 10 PHC clinics in Johannesburg, South Africa.

288 We compared baseline socio-demographic characteristics of study participants who completed  
 289 the training program with those who did not (Table 2). The median age for the cohort was 35  
 290 years (IQR: 31-416), with 90.0% being female. All study participants had their most recent  
 291 HIV test less than six months before study enrolment, and 90.0% reported a negative HIV test  
 292 result, while one declined to disclose their latest HIV test results. Those who did not complete  
 293 the training program had similar socio-demographic characteristics to those who did complete  
 294 the training, except for the type of house and HIV testing history.

295 **Table 2.** Baseline characteristics of counsellors who completed the pilot training program  
 296 compared to those who did not (n = 25)

|                                                                        | <b>Training<br/>not<br/>complete</b> | <b>Training<br/>completed</b> | <b>Total</b>       | <b>p-value</b> |
|------------------------------------------------------------------------|--------------------------------------|-------------------------------|--------------------|----------------|
|                                                                        | <i>No. (col %)</i>                   | <i>No. (col %)</i>            | <i>No. (col %)</i> |                |
| <b>Sex</b>                                                             |                                      |                               |                    |                |
| Female                                                                 | 15 (100.0)                           | 9 (90.0)                      | 24 (96.0)          | 0.400          |
| <b>Age MED (IQR)</b>                                                   | 39 (34-45)                           | 35 (31-46)                    | 38 (32-45)         |                |
| <40 years                                                              | 8 (53.3)                             | 7 (70.0)                      | 15 (60.0)          | 0.678          |
| ≥40 years                                                              | 7 (46.7)                             | 3 (30.0)                      | 10 (40.0)          |                |
| <b>Marital status</b>                                                  |                                      |                               |                    |                |
| Married                                                                | 4 (26.7)                             | 1 (10.0)                      | 5 (20.0)           |                |
| In a relationship                                                      | 7 (46.7)                             | 9 (90.0)                      | 16 (64.0)          | 0.102          |
| Single, no partner                                                     | 4 (26.7)                             | -                             | 4 (16.0)           |                |
| <b>Primary residence</b>                                               |                                      |                               |                    |                |
| Current house                                                          | 12 (92.3)                            | 6 (66.7)                      | 18 (81.8)          | 0.264          |
| Another province/rural area                                            | 1 (7.7)                              | 3 (33.3)                      | 4 (18.2)           |                |
| <b>Lives with</b>                                                      |                                      |                               |                    |                |
| With partner/spouse                                                    | 8 (57.1)                             | 5 (50.0)                      | 13 (54.2)          |                |
| Parents/relatives                                                      | 4 (28.6)                             | 1 (10.0)                      | 5 (20.8)           | 0.253          |
| Alone/with children                                                    | 2 (14.3)                             | 4 (40.0)                      | 6 (25.0)           |                |
| <b>Type of house</b>                                                   |                                      |                               |                    |                |
| House/ brick structure in its own stand or yard                        | 13 (92.9)                            | 4 (40.0)                      | 17 (70.8)          |                |
| House/ flat/ room in someone's house/ yard or informal dwelling/ shack | 1 (7.1)                              | 6 (60.0)                      | 7 (29.2)           | 0.009          |
| <b>Amenities index</b>                                                 |                                      |                               |                    |                |
| Low to medium                                                          | 4 (33.3)                             | 6 (75.0)                      | 10 (50.0)          | 0.170          |
| High                                                                   | 8 (66.7)                             | 2 (25.0)                      | 10 (50.0)          |                |
| <b>HIV testing history</b>                                             |                                      |                               |                    |                |
| Less than 6 months ago                                                 | 8 (53.3)                             | 10 (100.0)                    | 18 (72.0)          | 0.020          |
| 6 months ago, or longer                                                | 7 (46.7)                             | -                             | 7 (28.0)           |                |
| <b>HIV status</b>                                                      |                                      |                               |                    |                |
| HIV negative                                                           | 8 (53.3)                             | 9 (90.0)                      | 17 (68.0)          |                |
| HIV positive                                                           | 5 (33.3)                             | -                             | 5 (20.0)           | 0.137          |
| Declined to disclose                                                   | 2 (13.3)                             | 1 (10.0)                      | 3 (12.0)           |                |
| <b>Psychological well-being</b>                                        |                                      |                               |                    |                |
| Low                                                                    | 2 (13.3)                             | 4 (40.0)                      | 6 (24.0)           | 0.175          |
| Moderate to high                                                       | 13 (86.7)                            | 6 (60.0)                      | 19 (76.0)          |                |
| <b>Perceived Social support</b>                                        |                                      |                               |                    |                |
| Medium                                                                 | 3 (20.0)                             | 3 (30.0)                      | 6 (24.0)           | 0.653          |
| High                                                                   | 12 (80.0)                            | 7 (70.0)                      | 19 (76.0)          |                |
| <b>Depression</b>                                                      |                                      |                               |                    |                |
| No depression                                                          | 8 (53.3)                             | 9 (90.0)                      | 17 (68.0)          |                |
| low to med depression                                                  | 4 (26.7)                             | -                             | 4 (16.0)           | 0.158          |
| Major depression                                                       | 3 (20.0)                             | 1 (10.0)                      | 4 (16.0)           |                |
| <b>Highest education level</b>                                         |                                      |                               |                    |                |
| High school                                                            | 6 (40.0)                             | 4 (40.0)                      | 10 (40.0)          |                |
| Completed Grade 12                                                     | 4 (26.7)                             | 6 (60.0)                      | 10 (40.0)          | 0.089          |
| >Grade 12                                                              | 5 (33.3)                             | -                             | 5 (20.0)           |                |
| <b>English literacy</b>                                                |                                      |                               |                    |                |
| I can read very well                                                   | 10 (66.7)                            | 10 (100.0)                    | 20 (80.0)          | 0.061          |
| I can read somewhat                                                    | 5 (33.3)                             | -                             | 5 (20.0)           |                |
| <b>Basic counsellor training attendance</b>                            |                                      |                               |                    |                |
| ≤24 months ago                                                         | 8 (57.1)                             | 4 (40.0)                      | 12 (50.0)          | 0.680          |
| >24 months ago                                                         | 6 (42.9)                             | 6 (60.0)                      | 12 (50.0)          |                |
| <b>Basic counsellor training duration</b>                              |                                      |                               |                    |                |
| <10 days                                                               | 1 (6.7)                              | 1 (10.0)                      | 2 (8.0)            | 1.000          |
| ≥10 days                                                               | 14 (93.3)                            | 9 (90.0)                      | 23 (92.0)          |                |
| <b>Experience working as a counsellor</b>                              |                                      |                               |                    |                |
| <5 years                                                               | 5 (33.3)                             | 2 (20.0)                      | 7 (28.0)           | 0.659          |

|                                                 |           |          |           |       |
|-------------------------------------------------|-----------|----------|-----------|-------|
| ≥5 years                                        | 10 (66.7) | 8 (80.0) | 18 (72.0) |       |
| <b>Duration working at the current facility</b> |           |          |           |       |
| <5 years                                        | 7 (46.7)  | 4 (40.0) | 11 (44.0) | 1.000 |
| ≥5 years                                        | 8 (53.3)  | 6 (60.0) | 14 (56.0) |       |

297 *MED, median; IQR, interquartile range; HIV, human immunodeficiency*

298 Although all counsellors reported high English literacy levels, 40.0% did not complete high  
 299 school. However, all participants had received basic counsellor training, with 40% having  
 300 attended the training more than two years prior, and for the majority (90.0%), training lasted  
 301 for ten days or longer. Additionally, 80% of the counsellors had five years or more experience  
 302 working as lay counsellors, and 60% had spent the duration of their counselling experience  
 303 working in their current facility. Regarding mental health, one counsellor (10%) screened  
 304 positive for major depression, 40.0% reported a low level of psychosocial well-being, and 70%  
 305 reported high levels of perceived social support.

306 **MI competency scores**

307 MI competencies improved throughout the training program (Fig 2). Technical skills increased  
 308 from a mean of 2.5 (SD: 0.8) to 3.1 (SD: 0.5), with a mean difference of 0.6 (CI: 0.04, 0.9).  
 309 The MI relational skills improved from a mean of 3.2 (SD: 0.7) to 3.5 (SD: 0.6), with a mean  
 310 difference of 0.3 (95% CI: -0.3, 8.5).



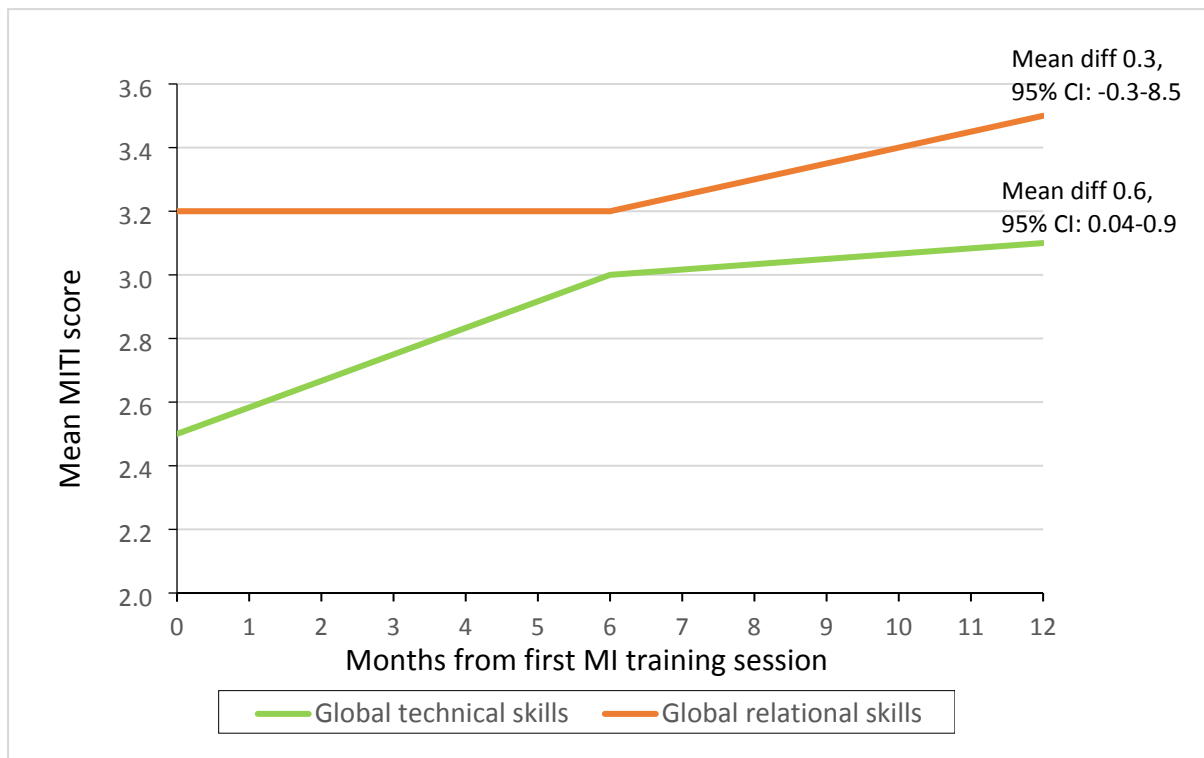

311

312 **Fig 2.** Global MI technical and relational scores over the 12-month Thusa-Thuso training and  
313 support period.

314 **Feasibility, acceptability, and experience of the pilot training among DoH lay**  
315 **counsellors**

316 A total of 11 Department of Health (DoH) lay counsellors (10 female, one male) who  
317 attended the pilot training program participated in the FGDs. Overall, lay counsellors were  
318 enthusiastic about the training program and appreciated the ongoing support. The analysis of  
319 the qualitative counsellor feedback was based on the training process model of readiness as  
320 follows:

321 **Knowledge: Re-orientation of critical basic counselling skills and patient-centred**  
322 **counselling**

323 The counsellors appreciated the refresher and the emphasis on basic counselling knowledge  
324 and skills. The approaches used in the training affirmed their baseline counselling knowledge  
325 and experience and highlighted areas where the practical application of the conceptual

326 knowledge had been challenging. As a result, counsellors reported improved confidence in  
327 their counselling conceptual knowledge, leading to enhanced self-efficacy in their counselling  
328 skills.

329 *"... we have gained like it was an eye-opener also for us to remind ourselves what*  
330 *counselling was all about and the skills which we are supposed to implement every day on*  
331 *counselling in our facilities". – Female, DOH lay counsellor – pilot training participant*

332 Participants highlighted how the MI training helped them re-focus on a patient-centred  
333 counselling approach, thus structuring their approaches to building counsellor-client rapport.  
334 Several reported that pressure from management to achieve certain HIV testing targets  
335 resulted in rushed counselling sessions. MI counselling skills helped them structure the 15-30  
336 minutes they spent with each patient, utilizing MI elicitation techniques to ensure clients felt  
337 listened to and supported.

338 *"...before, when we would just test patients, it would just test and go home. We would look at*  
339 *the queue and how long it is and don't check if the patient is satisfied or not. Now I can listen*  
340 *to them and make sure that when they leave, they are satisfied, and everything is right "* –

341 *Female, DOH lay counsellor – pilot training participant*

#### 342 **Motivation: MI counselling skills and perceived importance**

343 The developed training program emphasized the high value of lay counsellors in the care of  
344 PLHIV. Therefore, despite experiences of insensitivity within clinic settings, participating  
345 counsellors felt a renewed sense of pride in their role in clients' lives and communities.  
346 Additionally, participants reported increased self-awareness and mentioned how they had  
347 become conscious of how they approached each counselling session (both good methods and  
348 errors). Knowing their limitations meant they could ask for assistance from fellow  
349 counsellors to support them in difficult situations.

350 *"So, because he [the clinic manager] said we were going to school [the training], something*  
351 *that made me feel like I was serious. And to be serious, I gained a lot of knowledge. I took the*  
352 *training seriously" – Female, DOH lay counsellor – pilot training.*

353 *"What I like now is that no one will be on your back looking for stats. I know I am not here*  
354 *for the stats; I'm here for people's lives..." – Female, DOH lay counsellor – pilot training*  
355 *participant*

356 *"...if I say and I can feel that the patient is above me too much, I refer to my colleague. I*  
357 *would rather call her to come and attend to them, and they go away feeling right..." –*  
358 *Female, DOH lay counsellor – pilot training participant*

359 **Readiness: in-training guided practice, modelling, onsite practice, and refresher**  
360 **training**

361 The developed training program included practical sessions to prepare counsellors to apply  
362 the acquired MI skills in real-work situations. Counsellors could identify with the model  
363 counsellor, patient, and scenarios in training modelling videos and referred to the videos  
364 when highlighting examples of correct and incorrect MI counselling behaviours.

365 Initially, counsellors were nervous about audio recording their sessions for a skills review.  
366 However, after several sessions, they became more comfortable and could apply the skills  
367 they had learned during training. Listening to their counselling session was a new experience  
368 for them, and it provided a great opportunity to reflect on their counselling methods and use  
369 of MI counselling skills. Through this process, they identified their strengths and areas for  
370 improvement. They also valued feedback from the peer reviews of counselling audios.

371 *"I think, for me, the recordings, the time we were recording ourselves because we were*  
372 *listening to ourselves, that's whereby we see our mistakes... So, the recordings I see have*  
373 *worked very well for me." – Female, DOH lay counsellor – pilot training participant*

374 Participants viewed the refresher training sessions as valuable, worthwhile, and helpful in  
375 clarifying their MI skills. In addition, though counsellors were initially nervous about being  
376 observed during counselling sessions, they came to value the mentoring support. They also  
377 appreciated how facilitators affirmed their efforts and provided corrective feedback  
378 constructively.

379 *"...Then refreshers, I think they helped us a lot too. Unlike maybe if they had just done that*  
380 *first training, we would have forgotten a lot of things. Some of the [concepts] we were*  
381 *hearing them for the first time". – Female, DOH lay counsellor – pilot training participant*

### 382 **Scalability following dissemination and early implementation among district support** 383 **partners**

384 A total of 127 staff members from five NGOs attended the MI TOT workshops between  
385 November 2020 and January 2021. 42 TOT participants participated in the FGDs to provide  
386 feedback on their training and dissemination experiences (Table 1). Most participants were  
387 managers overseeing HTS programs, skills trainers, or supervisors of lay counsellors with  
388 extensive counselling skills. However, most had not previously encountered MI counselling.  
389 The participants appreciated how the training introduced MI counselling by linking it to their  
390 prior basic counselling skills and knowledge. They valued how the MI training prompted them  
391 to re-focus on patient-centred counselling. Many mentioned how the HIV program  
392 deliverables, including targets, often overshadowed patient needs, increasing the risk of poor-  
393 quality service and suboptimal patient experience.

394 *"...my overall experience about MI training is that I saw it brought back the people- the*  
395 *patient-centred approach. And then it brought back the importance of, you know, the patient*  
396 *knowing and actually wanting to take the medication because taking the medication will*  
397 *actually benefit her or him" – Female, NGO staff, TOT participant.*

398 One of the district support partners involved in the TOT experienced organizational  
399 restructuring, which saw some staff members retrenched, including some who participated in  
400 the TOT. The remaining participants expressed concerns regarding uncertainty around their  
401 continued employment, affecting their motivation for their job and disseminating the Thusa-  
402 Thuso MI training program.

403 *"Well, on my side, I didn't see the importance of that training... I wondered why they were*  
404 *taking us to train, knowing we were about to lose our jobs. It was just that even my mind was*  
405 *not there at all" – Male, NGO staff, TOT participant.*

406 The training language was a barrier that TOT participants had to overcome when implementing  
407 what they had learned. Participants had to translate key MI terms into local languages to  
408 facilitate understanding MI concepts, which became easier as they conducted more training.  
409 Participants perceived the training videos as helpful as they modelled realistic scenarios and  
410 were in local languages. The videos also gauged their trainees' understanding of MI concepts  
411 and skills during in-training roleplays and in-clinic mentoring support sessions. Trainees  
412 indicated they found the competency assessments valuable for continuing on-the-job  
413 development and quality assurance. However, TOT participants perceived the MITI review  
414 process and tool as too cumbersome for large-scale applications. Hence, some adapted the  
415 MITI tool into a scoring form for sit-in mentoring.

416 *"... it was best done using the local language because the participants were able to express*  
417 *themselves towards the clients and to dig more because it is easier when it is done in your*  
418 *local language..." – Female, NGO staff, TOT participant.*

419 *"So, incorporate the videos, sort of like more videos to explain some of the concepts, topics*  
420 *such as affirmation, so instead of just it being a lecture, lecture, lecture, let's cover some*

421 *practical stuff, the videos in the interactive stuff to sort of get the information in better". –*

422 *Male, NGO staff, TOT participant*

423 *"I thought, what made the job easier was also the role plays that were there because we were*

424 *able to incorporate our daily work into it..." – Female, NGO staff, TOT participant*

## 425 **Discussion**

426 Our findings indicate that MI skills can be effectively transferred to lay counsellors using a  
427 combination of training methods, including didactic presentations, open discussions, training  
428 videos, roleplays, and mentoring, all through simultaneous English and local language  
429 translations by bilingual trainers. The participating counsellor's fidelity to the intervention  
430 was moderate, suggesting the effectiveness of training procedures, quality assurance through  
431 MITI assessments, and mentoring by training facilitators. In addition, it was encouraging to  
432 observe the significant improvement in lay counsellors' MI relational skills, particularly in  
433 "Empathy and Partnerships", which are key components of MI counselling (23, 26). In our  
434 pilot study cohort, MI global ratings were higher than previous MI-based counselling  
435 interventions implemented in similar settings (32, 49-51). Although our sample size was  
436 smaller than other studies, most previous cohorts consisted of shorter training sessions with  
437 limited ongoing support. However, it would be difficult to make conclusive comparisons  
438 without adequately powered randomized controlled trials.

439 As MI skills have been reported to fluctuate over time, MI training programs must  
440 provide refresher training and ongoing mentoring support (29). The strengths of the Thusa-  
441 Thuso MI training program lie in the fact that the training duration is long enough to allow  
442 counsellors to grasp MI concepts and includes quarterly refresher training (26, 29, 52, 53).  
443 Notably, Avengeli et al. (2012) found marked improvements in MI skills when trainees  
444 attended follow-up training compared to those associated with the initial one-day training

445 workshop (54). In qualitative discussions in our study, lay counsellors noted that ongoing  
446 support through quarterly refresher training and mentoring enabled them to clarify MI skills  
447 learned at the baseline training.

448 The MITI tool (43) proved an effective quality assurance tool in the training program.  
449 Specifically, the tool supported trainers in providing standardized feedback to trainees on MI  
450 fidelity. As trainees shared their feedback with the group and trainers, they were able to  
451 demonstrate their understanding of key MI concepts and behaviours, which contributed to the  
452 overall learning of key MI concepts and behaviours. Previous reviews found that not all MI  
453 training programs used validated MI treatment integrity instruments to assess counsellor  
454 fidelity (55). Consequently, it would be difficult to attribute the failure or success of MI  
455 interventions to fidelity or the intervention itself (55). Therefore, the use of MI in  
456 implementation should include periodic assessments of treatment integrity using a validated  
457 instrument such as the MITI coding tool (43, 55).

458 However, the MITI tool proved too onerous for large-scale use by NGOs. Instead,  
459 partners adapted the tool into a scoring form to document sit-in mentoring sessions for  
460 trainees during implementation. Thus, the MITI tool needs to be validated for broader  
461 application to organizations scaling up MI counselling for their health programs.

462 In our broader study, high attrition rates from the year-long training program  
463 contributed to post-training skill erosion. For the pilot lay counsellor training, attrition  
464 resulted from logistical barriers in implementation and lay counsellor deaths. All deaths  
465 occurred among HIV-positive counsellors, but the causes are unknown. NGO-supported lay  
466 counsellors enrolled for baseline training were no longer working at the study site because  
467 funding and support had ceased. Additionally, scale-up was also marred by attrition among  
468 TOT trainees owing to staff retrenchments related to the cessations of donor funding among  
469 NGO partners. Thus, these skills were lost to the organization and NGO-supported public

470 health facilities. The sustainability of acquired is critical for supporting health programs to  
471 benefit from the scale-up of MI counselling implementation.

## 472 **Limitations**

473 A major limitation of this study is the small sample size of the pilot test, attrition caused by  
474 staff turnover and study site challenges, reducing the sample size even further. In addition,  
475 the lack of a control group limits conclusions about the causes of observed changes in MI  
476 skill proficiency.

477 An additional limitation is that participants in the pilot training were from clinics in  
478 urban settings. Therefore, application in rural settings remains untested. Furthermore, as  
479 participating lay counsellors were aware of the purpose of the study, their counselling  
480 recordings may have been influenced by perceived pressure to provide a best-case picture of  
481 practice-in-work and training settings. Moreover, even though participation in the training  
482 was not mandatory, lay counsellors were informed by their supervisors of the training  
483 program. Thus, there may have been undue expectations that participation in the training  
484 could lead to better job opportunities or integration into the formal health workforce. These  
485 factors may have initially influenced participants' motivation and enthusiasm for the training.

486 Despite these limitations, results from the study provide direction and considerations  
487 for future, more rigorous studies.

## 488 **Conclusions**

489 Our findings suggest participating lay counsellors perceived the Thusa-Thuso MI program as  
490 feasible and acceptable. Additionally, scale-up through TOT is possible with flexibility for  
491 adaptations without the elimination of core MI concepts and skills and applying theory and  
492 evidence-based training methodologies. However, larger studies are needed to determine the  
493 effect of the Thusa-Thuso program on patient ART adherence and retention.



## 494 **Supporting information**

495 Supplementary Fig 1. HIV treatment readiness framework

## 496 **Acknowledgements**

497 We would like to express our gratitude and recognition to the lay counsellors who took part  
498 in the pilot training and study, as well as our appreciation for the contributions of Michael  
499 Mothapo, who served as the study interviewer, and the dedicated trainers involved in the  
500 TOT scale-up initiatives. We also gratefully acknowledge individuals and partner  
501 organisations involved at various stages of the implementation of the Thusa-Thuso program  
502 pilot study. Right to Care (RTC), ANOVA Health Institute (ANVOA), Wits Reproductive  
503 Health Institute (WRHI) and Maternal, Adolescent and Child Health (MatCH); local NGO  
504 partners to the South African National and Gauteng provincial Department of Health, for  
505 participating in the scale-up strategy for the training program. We also thank ANOVA and  
506 RCT staff for providing feedback on the TOT experience and the scale-up process. We are  
507 also grateful to clinic managers from Region A and B clinics in the Johannesburg Health  
508 District and district staff, including district managers, for supporting the implementation of  
509 the pilot training.

## 510 **Declaration of Conflicting Interests**

511 The authors declare that there is no conflict of interest.

## 512 **Funding**

513 This study has been made possible by the generous support of the American People and the  
514 President's Emergency Plan for AIDS Relief (PEPFAR) through United States Agency for  
515 International Development (USAID) under the terms of Cooperative Agreements 674-A-12-  
516 00029 and 72067419CA00004 to the Health Economics and Epidemiology Research Office,  
517 and the Cooperative Agreement 674-A-12-00020 to Right to Care. The contents are the

518 responsibility of the authors and do not necessarily reflect the views of PEPFAR, USAID or  
519 the United States government.

## 520 **Author's contribution**

521 DO conceptualise the project. DO, IM TS and MV participated in the pilot training. IM and  
522 DO drafted the manuscript. RR and JM provided comments on the manuscript. All authors  
523 critically reviewed and approved the final version of the manuscript.

## 524 **References**

- 525 1. World Health Organization (WHO). Consolidated guidelines for the use antiretroviral drugs  
526 for treating and preventing HIV infection: recommendations for a public health approach -  
527 2nd ed. Geneva: WHO; 2016.
- 528 2. Joint United Nations Programme on HIV/AIDS (UNAIDS). HIV and AIDS estimates (2015).  
529 2015 [21 November 2021]. Available from: <https://aidsinfo.unaids.org/>.
- 530 3. Joint United Nations Programme on HIV/AIDS (UNAIDS): Country factsheets: SOUTH  
531 AFRICA 2021. UNAIDS data 2020 [18 November 2021]. Available from:  
532 <https://www.unaids.org/en/regionscountries/countries/southafrica>.
- 533 4. Mshweshwe-Pakela N, Hansoti B, Mabuto T, Kerrigan D, Kubeka G, Hahn E, et al.  
534 Feasibility of implementing same-day antiretroviral therapy initiation during routine care in  
535 Ekurhuleni District, South Africa: Retention and viral load suppression. *Southern African*  
536 *Journal of HIV Medicine*. 2020;21:1-6.
- 537 5. Onoya D, Sineke T, Hendrickson C, Mokhele I, Maskew M, Long LC, et al. Impact of the test  
538 and treat policy on delays in antiretroviral therapy initiation among adult HIV positive  
539 patients from six clinics in Johannesburg, South Africa: results from a prospective cohort  
540 study. *BMJ Open*. 2020;10(3):e030228.
- 541 6. Onoya D, Sineke T, Mokhele I, Bor J, Fox MP, Miot J. Understanding the Reasons for  
542 Deferring ART Among Patients Diagnosed Under the Same-Day-ART Policy in  
543 Johannesburg, South Africa. *AIDS and Behavior*. 2021;25(9):2779-92.
- 544 7. Katz IT, Dietrich J, Tshabalala G, Essien T, Rough K, Wright AA, et al. Understanding  
545 Treatment Refusal Among Adults Presenting for HIV-Testing in Soweto, South Africa: A  
546 Qualitative Study. *AIDS and Behavior*. 2015;19(4):704-14.
- 547 8. Katz IT, Bangsberg DR. Cascade of refusal—what does it mean for the future of treatment as  
548 prevention in sub-saharan Africa? *Current HIV/AIDS Reports*. 2016;13(2):125-30.
- 549 9. Rosen S, Maskew M, Fox MP, Nyoni C, Mongwenyana C, Maletse G, et al. Initiating  
550 Antiretroviral Therapy for HIV at a Patient's First Clinic Visit: The RapIT Randomized  
551 Controlled Trial. *PLOS Medicine*. 2016;13(5):e1002015.
- 552 10. Hendrickson CJ, Pascoe SJS, Huber AN, Moolla A, Maskew M, Long LC, et al. "My future is  
553 bright...I won't die with the cause of AIDS": ten-year patient ART outcomes and experiences  
554 in South Africa. *Journal of the International AIDS Society*. 2018;21(10):e25184.
- 555 11. Onoya D, Mokhele I, Sineke T, Mngoma B, Moolla A, Vujovic M, et al. Health provider  
556 perspectives on the implementation of the same-day-ART initiation policy in the Gauteng  
557 province of South Africa. *Health Research Policy and Systems*. 2021;19(1):1-12.
- 558 12. Reynolds A. Patient-centered care. *Radiologic technology*. 2009;81(2):133-47.
- 559 13. National Department of Health Republic of South Africa (NDOH). National guidelines on  
560 conducting patient experiences of care surveys in public health establishments. Pretoria, South  
561 Africa 2017.

- 562 14. Makhado L, Davhana-Maselesele M, Lebesse RT, Maputle SM. Factors facilitating trained  
563 NIMART nurses' adherence to treatment guidelines: a vital matter in the management of  
564 TB/HIV treatment in South Africa. *BMC Nursing*. 2020;19(1):77.
- 565 15. Hontelez JA, Newell M-L, Bland RM, Munnely K, Lessells RJ, Bärnighausen T. Human  
566 resources needs for universal access to antiretroviral therapy in South Africa: a time and  
567 motion study. *Human resources for health*. 2012;10(1):1-12.
- 568 16. Bärnighausen T, Bloom DE, Humair S. Universal antiretroviral treatment: the challenge of  
569 human resources. *Bulletin of the World Health Organization*. 2010;88:951-2.
- 570 17. Dewing S, Mathews C, Cloete A, Schaay N, Simbayi L, Louw J. Lay counselors' ability to  
571 deliver counseling for behavior change. *Journal of consulting and clinical psychology*.  
572 2014;82(1):19.
- 573 18. Bemelmans M, Baert S, Negussie E, Bygrave H, Biot M, Jamet C, et al. Sustaining the future  
574 of HIV counselling to reach 90-90-90: a regional country analysis. *Journal of the International  
575 AIDS Society*. 2016;19(1).
- 576 19. World Health Organization (WHO). Task shifting: rational redistribution of tasks among  
577 health workforce teams: global recommendations and guidelines. 2007.
- 578 20. Mohlabane NP, K., Mwisongo, A., Ntsepe, Y., Tutshana, B., Van Rooyen, H. and Knight, L.  
579 Quality of HIV Counselling in South Africa. *Journal of Psychology [Delhi]*. 2015;6(1):19-31.
- 580 21. Mwisongo A, Mehlokhulu V, Mohlabane N, Peltzer K, Mthembu J, Van Rooyen H.  
581 Evaluation of the HIV lay counselling and testing profession in South Africa. *BMC Health  
582 Services Research*. 2015;15(1):278.
- 583 22. Grimsrud A, Bygrave H, Doherty M, Ehrenkranz P, Ellman T, Ferris R, et al. Reimagining  
584 HIV service delivery: the role of differentiated care from prevention to suppression 2016.
- 585 23. Miller W, Rollnick S. Motivational interviewing: Preparing people for change. *Journal for  
586 Healthcare Quality*. 2003;25(3):46.
- 587 24. Jardien-Baboo S, Ricks E, ten Ham-Baloyi W, van Rooyen D, Jordan P. Best Practice  
588 Guideline for Patient-Centred Care in South African Public Hospitals. *Africa Journal of  
589 Nursing & Midwifery*. 2019;21(2).
- 590 25. Miller WR, Rollnick S. *Motivational interviewing: Helping people change*: Guilford press;  
591 2012.
- 592 26. Miller WR, Rose GS. Toward a theory of motivational interviewing. *American psychologist*.  
593 2009;64(6):527.
- 594 27. Carroll KM, Ball SA, Nich C, Martino S, Frankforter TL, Farentinos C, et al. Motivational  
595 interviewing to improve treatment engagement and outcome in individuals seeking treatment  
596 for substance abuse: A multisite effectiveness study. *Drug and alcohol dependence*.  
597 2006;81(3):301-12.
- 598 28. Soria R, Legido A, Escolano C, Yeste AL, Montoya J. A randomised controlled trial of  
599 motivational interviewing for smoking cessation. *British journal of general practice*.  
600 2006;56(531):768-74.
- 601 29. Miller WR, Mount KA. A small study of training in motivational interviewing: Does one  
602 workshop change clinician and client behavior? *Behavioural and Cognitive Psychotherapy*.  
603 2001;29(4):457-71.
- 604 30. Baer JS, Rosengren DB, Dunn CW, Wells EA, Ogle RL, Hartzler B. An evaluation of  
605 workshop training in motivational interviewing for addiction and mental health clinicians.  
606 *Drug and alcohol dependence*. 2004;73(1):99-106.
- 607 31. Hill S, Kavookjian J. Motivational interviewing as a behavioral intervention to increase  
608 HAART adherence in patients who are HIV-positive: A systematic review of the literature.  
609 *AIDS Care*. 2012;24(5):583-92.
- 610 32. Dewing S, Mathews C, Schaay N, Cloete A. *Options for health: Western Cape: preliminary  
611 findings on the feasibility of incorporating options in to routine adherence counselling  
612 practice*. 2010.
- 613 33. Lee CS, López SR, Colby SM, Rohsenow D, Hernández L, Borrelli B, et al. Culturally  
614 adapted motivational interviewing for Latino heavy drinkers: Results from a randomized  
615 clinical trial. *Journal of ethnicity in substance abuse*. 2013;12(4):356-73.

- 616 34. Lee CS, López SR, Hernández L, Colby SM, Caetano R, Borrelli B, et al. A cultural  
617 adaptation of motivational interviewing to address heavy drinking among Hispanics. *Cultural*  
618 *diversity and ethnic minority psychology*. 2011;17(3):317.
- 619 35. Lee CS, Tavares T, Popat-Jain A, Naab P. Assessing treatment fidelity in a cultural adaptation  
620 of motivational interviewing. *Journal of ethnicity in substance abuse*. 2015;14(2):208-19.
- 621 36. Dewing S, Mathews C, Cloete A, Schaay N, Shah M, Simbayi L, et al. From research to  
622 practice: lay adherence counsellors' fidelity to an evidence-based intervention for promoting  
623 adherence to antiretroviral treatment in the Western cape, South Africa. *AIDS and Behavior*.  
624 2013;17(9):2935-45.
- 625 37. Moyers TB, Martin T, Manuel JK, Hendrickson SM, Miller WR. Assessing competence in the  
626 use of motivational interviewing. *Journal of substance abuse treatment*. 2005;28(1):19-26.
- 627 38. Onoya D, Jinga N, Nattey C, Mongwenyana C, Mngadi S, MacLeod WB, et al. Motivational  
628 interviewing retention counseling and adherence to early infant diagnostic HIV testing  
629 schedule in South Africa: The PAEDLINK randomized trial. *Medicine*. 2022;101(6).
- 630 39. Bernstein E, Bernstein JA, Stein JB, Saitz R. SBIRT in emergency care settings: are we ready  
631 to take it to scale? *Academic Emergency Medicine*. 2009;16(11):1072-7.
- 632 40. Eldridge LKB, Markham CM, Robert A C R, Fernández ME, Kok G, Parcel GS. *Planning*  
633 *health promotion programs: An Intervention Mapping approach* (4th ed.). Hoboken, NJ: Wiley;  
634 2016.
- 635 41. Mokhele I, Sineke T, Vuyovic M, Fox M, Ruiter R, Onoya D. Using Intervention Mapping to  
636 Develop a Motivational Interviewing Training and Support Program for HIV Lay Counsellors  
637 to Improve ART Uptake in The Primary Health Care Setting in Gauteng, South Africa. 2019.
- 638 42. Moyers TB, Rowell LN, Manuel JK, Ernst D, Houck JM. The Motivational Interviewing  
639 Treatment Integrity Code (MITI 4): Rationale, Preliminary Reliability and Validity. *Journal of*  
640 *substance abuse treatment*. 2016;65:36-42.
- 641 43. Moyers T, Martin T, Manual J, Miller W. *The motivational interviewing treatment integrity*  
642 *code*. Albuquerque: University of New Mexico. 2003.
- 643 44. Mokhele I, Sineke T, Vujovic M, Ruiter RAC, Fox MP, Onoya D. Using Intervention  
644 Mapping to Develop a Motivational Interviewing Training and Support Program for HIV Lay  
645 Counsellors to Improve ART Uptake in The Primary Health Care Setting in Gauteng, South  
646 Africa. 2019.
- 647 45. Fisher JD, Fisher WA. Changing AIDS-risk behavior. *Psychological bulletin*.  
648 1992;111(3):455.
- 649 46. Prochaska JO, Velicer WF. The transtheoretical model of health behavior change. *American*  
650 *journal of health promotion*. 1997;12(1):38-48.
- 651 47. Ajzen I. Perceived behavioral control, self-efficacy, locus of control, and the theory of  
652 planned behavior 1. *Journal of applied social psychology*. 2002;32(4):665-83.
- 653 48. Wabiri N, Taffa N. Socio-economic inequality and HIV in South Africa. *BMC public health*.  
654 2013;13(1):1037.
- 655 49. Evangeli M, Engelbrecht S-K, Swartz L, Turner K, Forsberg L, Soka N. An evaluation of a  
656 brief motivational interviewing training course for HIV/AIDS counsellors in Western Cape  
657 Province, South Africa. *AIDS care*. 2009;21(2):189-96.
- 658 50. Mash R, Baldassini G, Mkhathshwa H, Sayeed I, Ndapeua S. Reflections on the training of  
659 counsellors in motivational interviewing for programmes for the prevention of mother to child  
660 transmission of HIV in sub-Saharan Africa: open forum. *South African Family Practice*.  
661 2008;50(2):53-9.
- 662 51. Grodensky CA, Golin CE, Pack AP, Pettifor A, Demers M, Massa C, et al. Adaptation and  
663 delivery of a motivational interviewing-based counseling program for persons acutely  
664 infected with HIV in Malawi: Implementation and lessons learned. *Patient education and*  
665 *counseling*. 2018;101(6):1103-9.
- 666 52. Mash RJ, Rhode H, Zwarenstein M, Rollnick S, Lombard C, Steyn K, et al. Effectiveness of a  
667 group diabetes education programme in under-served communities in South Africa: a  
668 pragmatic cluster randomized controlled trial. *Diabetic Medicine*. 2014;31(8):987-93.

- 669 53. Dewing S, Mathews C, Cloete A, Schaay N, Shah M, Simbayi L, et al. From research to  
670 practice: lay adherence counsellors' fidelity to an evidence-based intervention for promoting  
671 adherence to antiretroviral treatment in the Western Cape, South Africa. *AIDS and Behavior*.  
672 2013;17(9):2935.
- 673 54. Evangeli M, Longley M, Swartz L. No reductions and some improvements in South African  
674 lay HIV/AIDS counsellors' motivational interviewing competence one year after brief  
675 training. *AIDS care*. 2011;23(3):269-73.
- 676 55. Lindson N, Thompson TP, Ferrey A, Lambert JD, Aveyard P. Motivational interviewing for  
677 smoking cessation. *Cochrane Database of Systematic Reviews*. 2019(7).

678
